# Supplementary material for: Structural Characteristics of High-Mobility Group Proteins HMGB1 and HMGB2 and Their Interaction with DNA
Source: MDPI journal article supplement (doi:10.3390/ijms24043577), 2023-02-10
Supplement: s1 [file s1]

### Electrophoresis of HMGB1 and HMGB2 isolated from calf thymus.

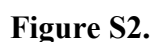

(b) Denaturing electrophoresis of HMGB1/2-rich extracts from calf thymus.

(c) Identification of HMGB1 and HMGB2 proteins from calf thymus by Western Blot.

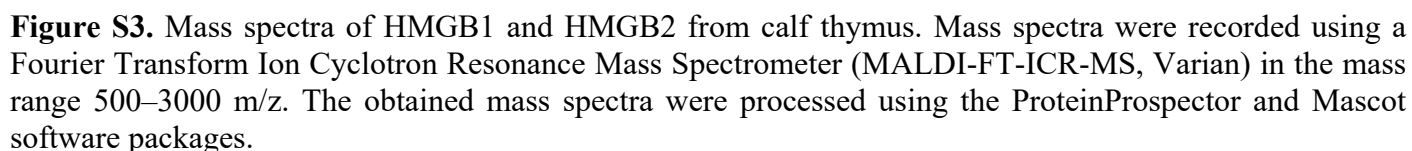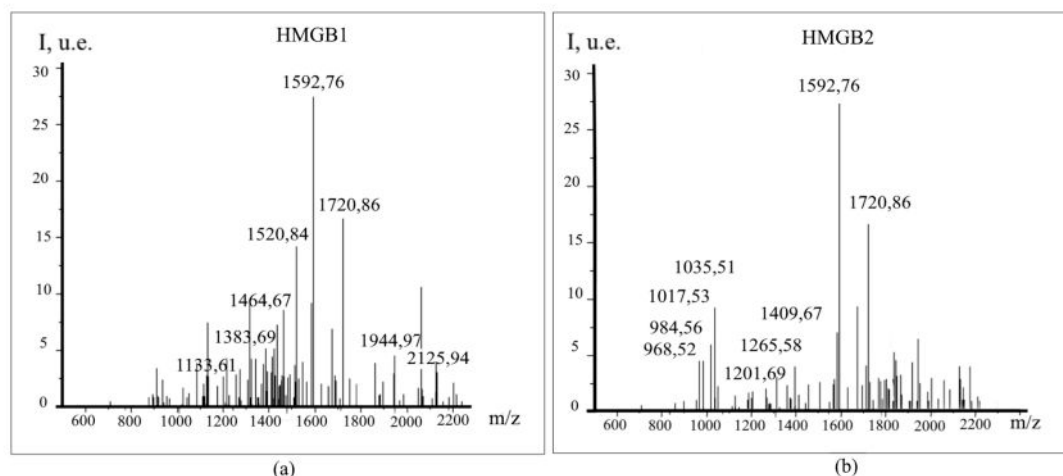

**Figure S4.** Map of the PTMs regions for the HMGB1 and HMGB2 proteins and comparison with the literature data [55,58].

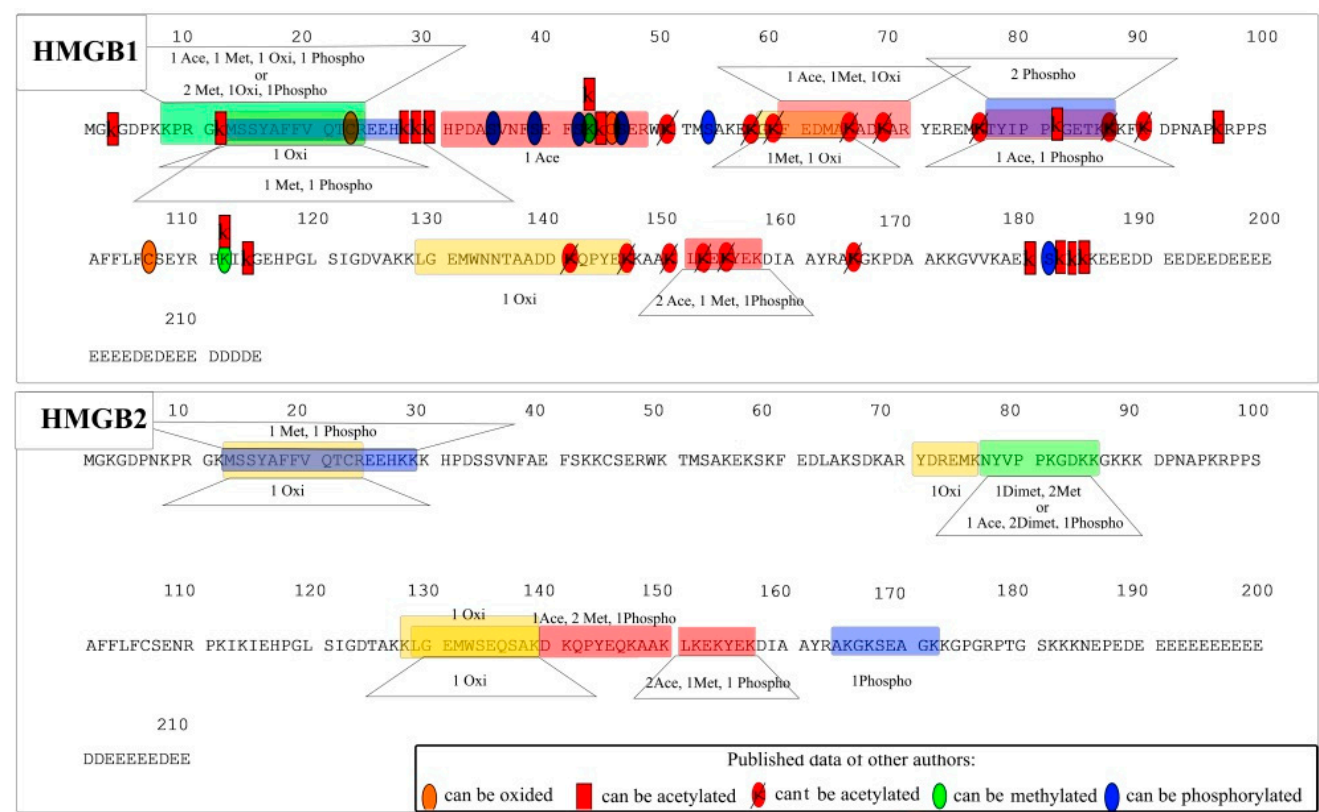

**Table S1.** The results of MALDI mass spectrometry analysis of HMGB1 and HMGB2 from calf thymus.

| protein | m/z         | I       | m/z teor  | ppm  | modification                  | peptide | sequence                 |
|---------|-------------|---------|-----------|------|-------------------------------|---------|--------------------------|
| HMGB2   | 708,366947  | 0,3540  | 708,3675  | 0,78 |                               | 158-163 | (K)DIAAYR(A)             |
| HMGB1   | 708,366947  | 0,3540  | 708,3675  | 0,78 |                               | 158-163 | (K)DIAAYR(A)             |
| HMGB2   | 857,382193  | 0,5930  | 857,3822  | 0,01 | 1Oxidation                    | 71-76   | (R)YDREMKN(N)            |
| HMGB2   | 897,515494  | 0,7370  | 897,5152  | 0,33 |                               | 89-96   | (K)KKDPNAPK(R)           |
| HMGB1   | 916,488975  | 0,8600  | 916,4887  | 0,30 |                               | 89-96   | (K)FKDPNAPK(R)           |
| HMGB1   | 941,438613  | 0,3260  | 941,4397  | 1,15 | 1Oxidation                    | 58-65   | (K)GKFEDMAK(A)           |
| HMGB2   | 955,455764  | 0,8400  | 955,4608  | 5,27 | 1Phospho                      | 164-172 | (R)AKGKSEAGK(K)          |
| HMGB1   | 955,455764  | 0,8400  | 955,4553  | 0,49 | 1Methyl 1Oxidation            | 58-65   | (K)GKFEDMAK(A)           |
| HMGB2   | 968,529299  | 4,4120  | 968,5272  | 2,17 |                               | 4-12    | (K)GDPNKPGRGK(M)         |
| HMGB2   | 984,560357  | 4,3090  | 984,5585  | 1,89 |                               | 173-182 | (K)KGPRPTGSK(K)          |
| HMGB2   | 1115,537124 | 0,3640  | 1115,5384 | 1,14 | 2Acetyl 1Methyl 1Phospho      | 151-157 | (K)LKEKYEK(D)            |
| HMGB1   | 1115,537124 | 0,3640  | 1115,5384 | 1,14 | 2Acetyl 1Methyl 1Phospho      | 151-157 | (K)LKEKYEK(D)            |
| HMGB2   | 1017,5379   | 5,8660  | 1017,5364 | 1,47 |                               | 77-85   | (K)NYVPPKGDK(K)          |
| HMGB2   | 1035,510367 | 9,1470  | 1035,5106 | 0,23 |                               | 140-147 | (K)DKQPYEQK(A)           |
| HMGB2   | 1128,571016 | 0,2590  | 1128,5684 | 2,32 |                               | 155-163 | (K)YEKDIAAYR(A)          |
| HMGB1   | 1128,571016 | 0,2590  | 1128,5684 | 2,32 |                               | 155-163 | (K)YEKDIAAYR(A)          |
| HMGB1   | 1133,61991  | 2,6130  | 1133,6201 | 0,17 |                               | 77-86   | (K)TYIPPKGETK(K)         |
| HMGB2   | 1145,632766 | 0,2400  | 1145,6313 | 1,28 |                               | 77-86   | (K)NYVPPKGDKK(G)         |
| HMGB2   | 1201,692253 | 1,0570  | 1201,6939 | 1,37 | 1Dimethyl 2Methyl             | 77-86   | (K)NYVPPKGDKK(G)         |
| HMGB2   | 1265,584401 | 1,8770  | 1265,5831 | 1,03 |                               | 129-139 | (K)LGEMWSEQSAK(D)        |
| HMGB2   | 1279,662849 | 0,5250  | 1279,6641 | 0,98 |                               | 60-70   | (K)FEDLAKSDKAR(Y)        |
| HMGB1   | 1279,662849 | 0,5250  | 1279,6641 | 0,98 |                               | 115-127 | (K)GEHPGLSIGDVAK(K)      |
| HMGB2   | 1281,577019 | 0,5560  | 1281,5780 | 0,77 | 1Oxidation                    | 129-139 | (K)LGEMWSEQSAK(D)        |
| HMGB2   | 1323,672416 | 0,2720  | 1323,6708 | 1,22 | 1Acetyl 2Dimethyl<br>1Phospho | 77-86   | (K)NYVPPKGDKK(G)         |
| HMGB1   | 1353,647141 | 0,2720  | 1353,6467 | 0,33 | 1Acetyl 1Methyl<br>1Oxidation | 60-70   | (K)FEDMAKADKAR(Y)        |
| HMGB1   | 1383,690879 | 5,1060  | 1383,6920 | 0,81 | 1Acetyl 1Phospho              | 77-87   | (K)TYIPPKGETKK(K)        |
| HMGB2   | 1393,678039 | 0,2770  | 1393,6780 | 0,03 |                               | 128-139 | (K)KLGMWSEQSAK(D)        |
| HMGB2   | 1409,672726 | 1,3880  | 1409,6729 | 0,12 | 1Oxidation                    | 128-139 | (K)KLGMWSEQSAK(D)        |
| HMGB1   | 1421,654057 | 0,6890  | 1421,6477 | 4,47 | 2Phospho                      | 77-87   | (K)TYIPPKGETKK(K)        |
| HMGB2   | 1439,644988 | 0,6530  | 1439,6446 | 0,27 |                               | 13-24   | (K)MSSYAFFVQTCR(E)       |
| HMGB1   | 1439,644988 | 0,6530  | 1439,6446 | 0,27 |                               | 13-24   | (K)MSSYAFFVQTCR(E)       |
| HMGB2   | 1455,640633 | 2,2720  | 1455,6395 | 0,78 | 1Oxidation                    | 13-24   | (K)MSSYAFFVQTCR(E)       |
| HMGB1   | 1455,640633 | 2,2720  | 1455,6395 | 0,78 | 1Oxidation                    | 13-24   | (K)MSSYAFFVQTCR(E)       |
| HMGB2   | 1455,690652 | 0,8010  | 1455,6879 | 1,89 | 1Acetyl 2Methyl 1Phospho      | 140-150 | (K)DKQPYEQKAAK(L)        |
| HMGB1   | 1464,67626  | 8,5510  | 1464,6754 | 0,59 |                               | 31-43   | (K)HPDASVNFSEFSK(K)      |
| HMGB1   | 1520,842667 | 14,1540 | 1520,8431 | 0,28 |                               | 113-127 | (K)IKGEHPGLSIGDVAK(K)    |
| HMGB2   | 1592,769672 | 27,4630 | 1592,7703 | 0,39 |                               | 30-43   | (K)KHPDSSVNFSEFSK(K)     |
| HMGB1   | 1592,769672 | 27,4630 | 1592,7703 | 0,39 |                               | 31-44   | (K)HPDASVNFSEFSKK(C)     |
| HMGB1   | 1592,769672 | 27,4630 | 1592,7703 | 0,39 |                               | 30-43   | (K)KHPDASVNFSEFSK(K)     |
| HMGB1   | 1720,865299 | 16,6560 | 1720,8653 | 0,00 |                               | 29-43   | (K)KKHPDASVNFSEFSK(K)    |
| HMGB1   | 1720,865299 | 16,6560 | 1720,8653 | 0,00 |                               | 30-44   | (K)KHPDASVNFSEFSKK(C)    |
| HMGB2   | 1720,865299 | 16,6560 | 1720,8653 | 0,00 |                               | 29-43   | (K)KKHPDSSVNFSEFSK(K)    |
| HMGB2   | 1720,865299 | 16,6560 | 1720,8653 | 0,00 |                               | 30-44   | (K)KHPDSSVNFSEFSKK(C)    |
| HMGB2   | 1741,743191 | 0,9160  | 1741,7420 | 0,68 | 1Dimethyl 1Methyl<br>2Phospho | 71-82   | (R)YDREMKNYVPPK(G)       |
| HMGB1   | 1944,976296 | 4,4380  | 1944,9789 | 1,34 |                               | 97-112  | (K)RPSSAFFLCSEYRPK(I)    |
| HMGB1   | 2109,963844 | 0,6290  | 2109,9658 | 0,93 | 1Acetyl                       | 31-48   | (K)HPDASVNFSEFSKKCSER(W) |
| HMGB1   | 2125,947941 | 3,9420  | 2125,9495 | 0,73 | 1Oxidation                    | 129-146 | (K)LGEMWNNTAADDKQPYEK(K) |

|       |             |        |           |      |                                        |         |                           |
|-------|-------------|--------|-----------|------|----------------------------------------|---------|---------------------------|
| HMGB1 | 2130,002003 | 2,9790 | 2130,0024 | 0,19 | 2Methyl 1Oxidation<br>1Phospho         | 8-24    | (K)KPRGKMSSYAFFVQTCR(E)   |
| HMGB1 | 2157,996842 | 0,3960 | 2157,9964 | 0,20 | 1Acetyl 1Methyl<br>1Oxidation 1Phospho | 8-24    | (K)KPRGKMSSYAFFVQTCR(E)   |
| HMGB2 | 2184,962069 | 0,7640 | 2184,9606 | 0,67 | 1Methyl 1Phospho                       | 13-29   | (K)MSSYAFFVQTCREEHKK(K)   |
| HMGB1 | 2184,962069 | 0,7640 | 2184,9606 | 0,67 | 1Methyl 1Phospho                       | 13-29   | (K)MSSYAFFVQTCREEHKK(K)   |
| HMGB1 | 2238,054522 | 0,4500 | 2238,0496 | 2,20 |                                        | 128-146 | (K)KLGEMWNNTAADDKQPYEK(K) |
| HMGB1 | 2238,054522 | 0,4500 | 2238,0496 | 2,20 |                                        | 129-147 | (K)LGEMWNNTAADDKQPYEKK(A) |
